# Supplementary material
Source: Springer Nature journal article supplement (https://www.springermedizin.de/resource/supplementary/12943_2009_547_MOESM4_ESM.pdf/9554942)

**A**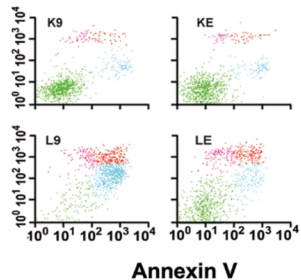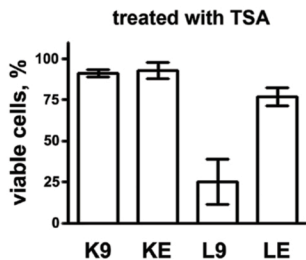**C**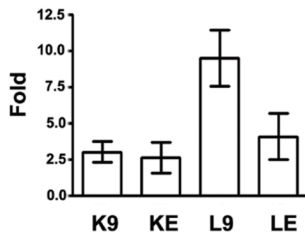**E**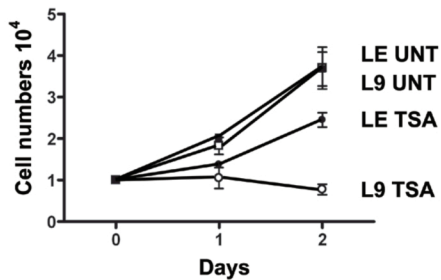**B**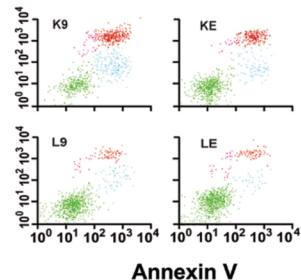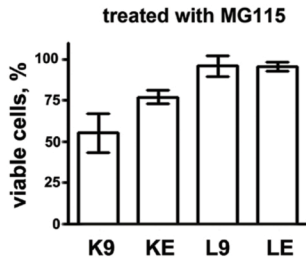**D**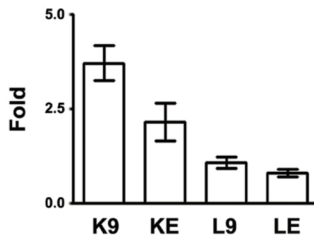**F**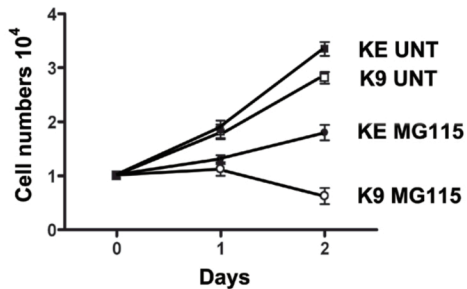

Supplement: MOESM4 [file 9554942]
